# Supplementary material for: (TMT–TTF)[Pb2.6/3□0.4/3I2]3: a TTF-intercalated two-dimensional hybrid lead iodide: crystal structure and properties
Source: Royal Society of Chemistry journal article supplement (doi:10.1039/c9nj04316k), 2019-12-16
Supplement: c9nj04316k1.pdf [file c9nj04316k1.pdf]

## **(TMT-TTF)[Pb<sub>2.6/3</sub>□<sub>0.4/3</sub>I<sub>2</sub>]<sub>3</sub>: A TTF intercalated two-dimensional hybrid lead iodide: crystal structure and properties**

Wen-Yu Yin, Yi-Gang Weng, Miao Jiang, Shuai-Kang Yu, Qin-Yu Zhu,\* and Jie Dai\*

### **Figures**

**Fig. S1.** The experimental powder XRD patterns and the simulated patterns from the crystal data of compounds (TMT-TTF)[Pb<sub>2.6/3</sub>□<sub>0.4/3</sub>I<sub>2</sub>]<sub>3</sub> (**1**) and (TTF)Pb<sub>2</sub>I<sub>5</sub>.

**Fig. S2.** Thermogravimetric analysis of compound (TMT-TTF)[Pb<sub>2.6/3</sub>□<sub>0.4/3</sub>I<sub>2</sub>]<sub>3</sub> (**1**).

**Fig. S3.** Asymmetric unit structure of compound (TMT-TTF)[Pb<sub>2.6/3</sub>□<sub>0.4/3</sub>I<sub>2</sub>]<sub>3</sub> (**1**).

**Fig. S4.** Mott Schottky curves of (TTF)Pb<sub>2</sub>I<sub>5</sub> coated electrodes.

### **Table**

**Table S1.** Crystal data and structural refinement parameters for compound (TMT-TTF)[Pb<sub>2.6/3</sub>□<sub>0.4/3</sub>I<sub>2</sub>]<sub>3</sub> (**1**).

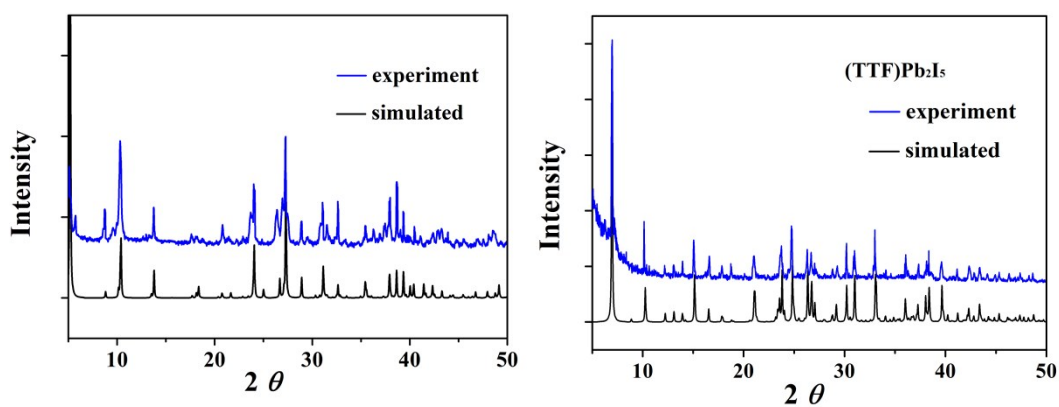

**Fig. S1.** The experimental powder XRD patterns and the simulated patterns from the crystal data of compounds (TMT-TTF)[Pb<sub>2.6/3</sub>□<sub>0.4/3</sub>I<sub>2</sub>]<sub>3</sub> (**1**) and (TTF)Pb<sub>2</sub>I<sub>5</sub>.

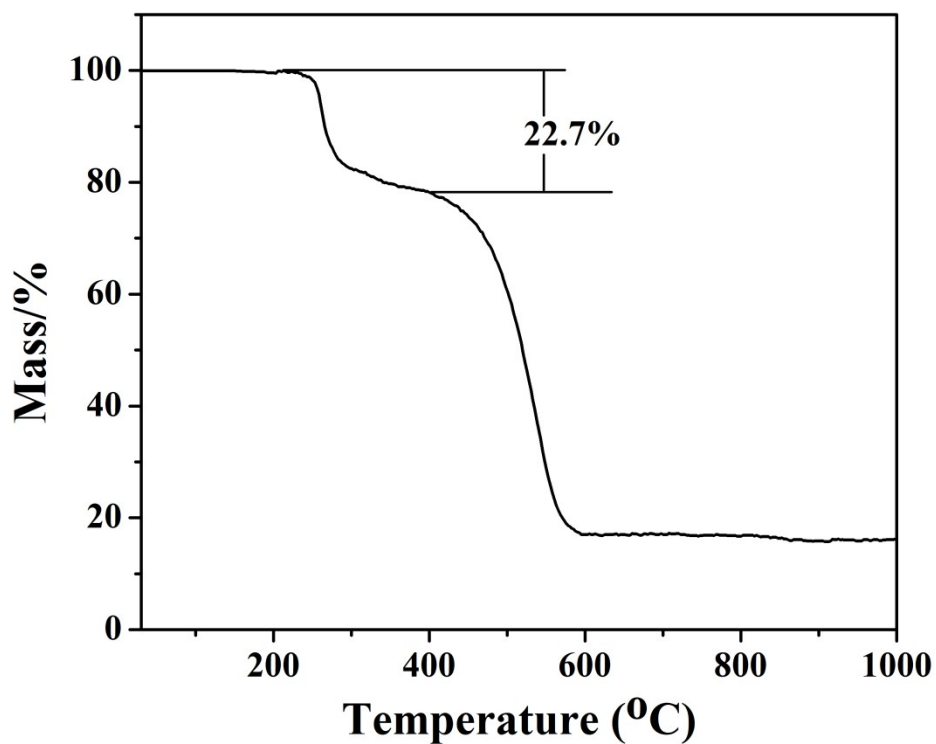

**Fig. S2.** Thermogravimetric analysis of compound (TMT-TTF)[Pb<sub>2.6/3</sub>□<sub>0.4/3</sub>I<sub>2</sub>]<sub>3</sub> (**1**).

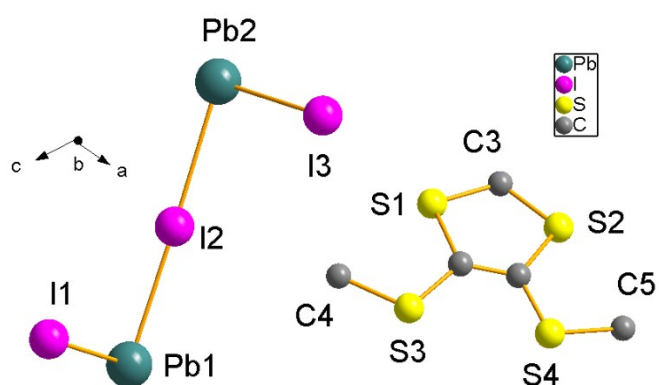

**Fig. S3.** Asymmetric unit structure of compound (TMT-TTF)[Pb<sub>2.6/3</sub>□<sub>0.4/3</sub>I<sub>2</sub>]<sub>3</sub> (**1**).

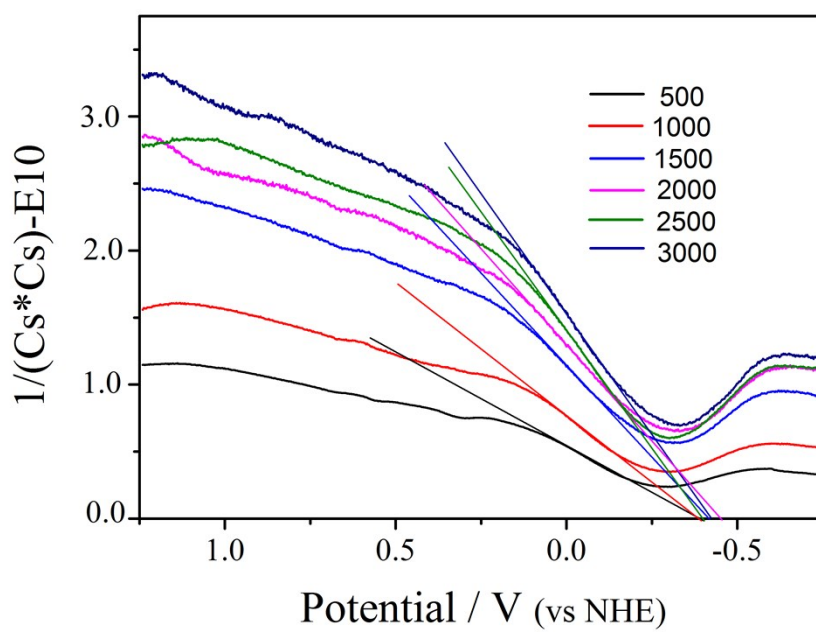

**Fig. S4.** Mott Schottky curves of (TTF)Pb<sub>2</sub>I<sub>5</sub> coated electrodes.

**Table S1.** Crystal data and structural refinement parameters for compound (TMT-TTF)[Pb<sub>2.6/3</sub>□<sub>0.4/3</sub>I<sub>2</sub>]<sub>3</sub> (**1**).

|                                                    |                                                                                 |
|----------------------------------------------------|---------------------------------------------------------------------------------|
| formula                                            | C <sub>10</sub> H <sub>12</sub> I <sub>6</sub> Pb <sub>2.6</sub> S <sub>8</sub> |
| fw                                                 | 1688.77                                                                         |
| cryst size (mm <sup>3</sup> )                      | 0.10×0.10×0.20                                                                  |
| cryst syst                                         | monoclinic                                                                      |
| space group                                        | <i>I2/m</i>                                                                     |
| <i>a</i> (Å)                                       | 19.5549(14)                                                                     |
| <i>b</i> (Å)                                       | 4.5007(2)                                                                       |
| <i>c</i> (Å)                                       | 19.9119(9)                                                                      |
| <i>α</i> (deg)                                     | 90                                                                              |
| <i>β</i> (deg)                                     | 119.0050(14)                                                                    |
| <i>γ</i> (deg)                                     | 90                                                                              |
| <i>V</i> (Å <sup>3</sup> )                         | 1532.66(14)                                                                     |
| <i>Z</i>                                           | 2                                                                               |
| $\rho_{\text{calcd}}$ (g cm <sup>-3</sup> )        | 3.659                                                                           |
| <i>F</i> (000)                                     | 1462                                                                            |
| $\mu$ (mm <sup>-1</sup> )                          | 20.839                                                                          |
| <i>T</i> (K)                                       | 223(2)                                                                          |
| reflns collected                                   | 24096                                                                           |
| unique reflns                                      | 2003                                                                            |
| observed reflns                                    | 1692                                                                            |
| no. params                                         | 106                                                                             |
| GOF on <i>F</i> <sup>2</sup>                       | 1.080                                                                           |
| <i>R</i> <sub>1</sub> [ <i>I</i> >2σ( <i>I</i> )]  | 0.0305                                                                          |
| <i>wR</i> <sub>2</sub> [ <i>I</i> >2σ( <i>I</i> )] | 0.0544                                                                          |
